# Supplementary material for: Screening the Presence of Non-Typhoidal Salmonella in Different Animal Systems and the Assessment of Antimicrobial Resistance
Source: MDPI journal article supplement (doi:10.3390/ani11061532), 2021-05-24
Supplement: s1 [file s1]

**Table S2. Results of the multivariate logistic regression model: exploratory analysis**

| Prevalence of AMR Salmonella                      |         | Model 3               |      |          | Model 4 |                                |      |          |
|---------------------------------------------------|---------|-----------------------|------|----------|---------|--------------------------------|------|----------|
| Variables                                         | OR      | OR 95%CI              | SE   | Pr(> z ) | OR      | OR 95%CI                       | SE   | Pr(> z ) |
| <b>System type<sup>a</sup></b> (ref.= free-range) |         |                       |      |          |         |                                |      |          |
| Closed                                            | 3.90**  | 1.36,11.20            | 2.10 | 0.011    | 1.42    | 0.45,4.48                      | 0.83 | 0.381    |
| <b>Sampling type<sup>a</sup></b> (ref.= animal)   |         |                       |      |          |         |                                |      |          |
| environment                                       | 0.89    | 0.28,2.84             | 0.53 | 0.847    | 1.97    | 0.64,5.99                      | 1.12 | 0.137    |
| <b>Serogroup type</b> (ref.= serogroup B)         |         |                       |      |          |         |                                |      |          |
| Serogroup C1                                      | 0.18**  | 0.04,0.74             | 0.13 | 0.018    | 0.28**  | 0.07,1.04                      | 0.19 | 0.050    |
| Serogroup C2-C3                                   | 1.09    | 0.13,9.37             | 1.20 | 0.931    | 1.02    | 0.09,12.08                     | 1.28 | 0.993    |
| Serogroup D                                       | 0.05**  | 0.00,0.55             | 0.06 | 0.015    | 0.07**  | 0.01,0.71                      | 0.09 | 0.024    |
| Serogroup E1                                      | 1.07    | 0.05,20.81            | 1.62 | 0.965    | 1.20    | 0.06,25.27                     | 1.87 | 0.906    |
| Serogroup N/D                                     | 0.00*** | 0.00,0.00             | 0.00 | <0.001   | 0.32    | 0.07,1.34                      | 0.24 | 0.121    |
| Constant term                                     | 0.94    | 0.32,2.71             | 0.51 | 0.903    | 0.83    | 0.24,2.85                      | 0.52 | 0.771    |
| Number of observations                            |         | 3,851                 |      |          |         | 98                             |      |          |
| Pseudo R <sup>2</sup>                             |         | 65.70                 |      |          |         | 16.79                          |      |          |
| AIC                                               |         | 191.11                |      |          |         | 130.55                         |      |          |
| VCE <sup>c</sup>                                  |         | Robust                |      |          |         | Robust                         |      |          |
| Sample                                            |         | All samples collected |      |          |         | <i>Salmonella</i> (+) isolates |      |          |

Reference group (ref.) stands for backyard chicken farms and serogroup B. Our dependent variable indicates the presence of resistance to at least one antimicrobial for *Salmonella*. SE stands for standard error, whereas OR is for Odds Ratios. <sup>a</sup>Some categories were dropped as they did not present variation over AMR prevalence (i.e., industrial dairy farm and other backyard animals). <sup>b</sup>Category dropped in Model 2 due to lack of variation over AMR prevalence. <sup>c</sup>Robust standard errors were estimated.: \* p<0.1, \*\* p<0.05, \*\*\* p<0.01
