# Supplementary material for: Screening the Presence of Non-Typhoidal Salmonella in Different Animal Systems and the Assessment of Antimicrobial Resistance
Source: MDPI journal article supplement (doi:10.3390/ani11061532), 2021-05-24
Supplement: s1 [file s1]

**Supplemental Figure 1. Predicted AMR prevalence from Figure 3 by system and sampling types**

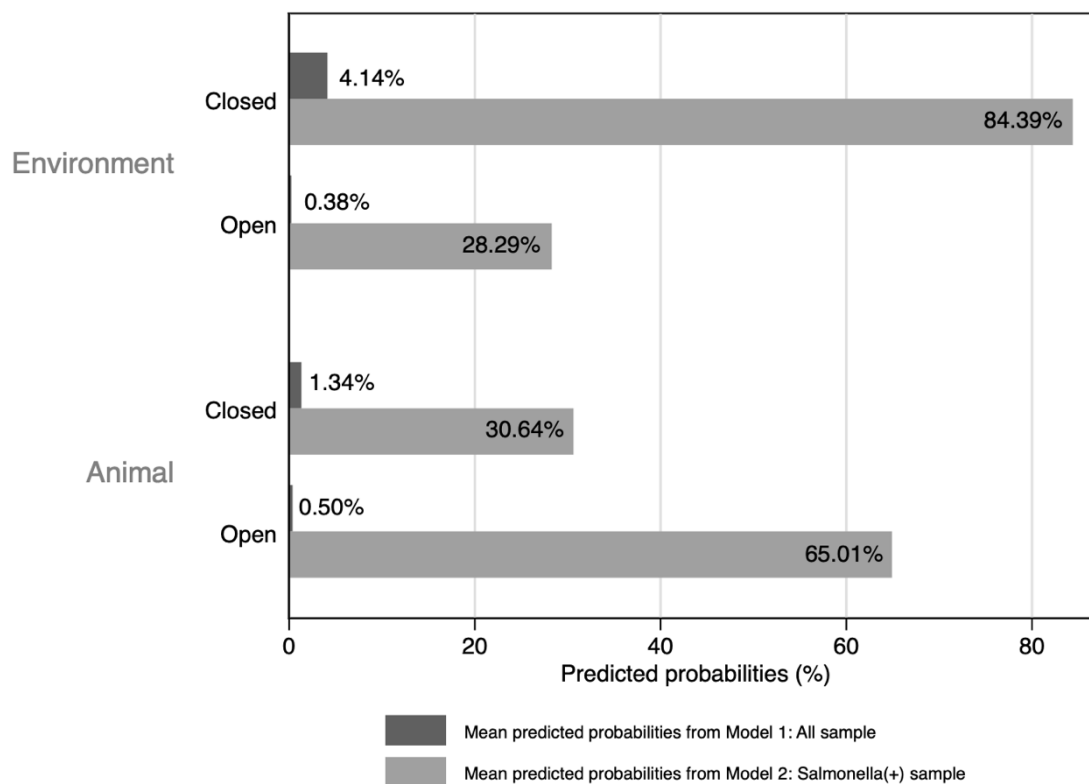

*Notes:* Mean of the predicted AMR prevalence from Model 1 and 2 (Figure 3). Y-axis classifies our sample into system and sampling types.
